1 **Cell-density independent increased lymphocyte production and loss rates post-autologous**  
2 **hematopoietic stem cell transplantation**

3 Mariona Baliu-Piqué<sup>1\*</sup>, Vera van Hoven<sup>2\*</sup>, Julia Drylewicz<sup>1\*</sup>, Lotte E. van der Wagen<sup>3</sup>, Anke Janssen<sup>1</sup>,  
4 Sigrid A. Otto<sup>1</sup>, Menno C. van Zelm<sup>4</sup>, Rob J. de Boer<sup>5</sup>, Jürgen Kuball<sup>1,3</sup>, José A.M. Borghans<sup>1\*</sup> and Kiki  
5 Tesselaar<sup>1\*</sup>

6 <sup>1</sup>Center for Translational Immunology, University Medical Center Utrecht, The Netherlands;

7 <sup>2</sup>Department of Experimental Immunology, Amsterdam UMC, University of Amsterdam, The Netherlands;

8 <sup>3</sup>Department of Hematology, University Medical Center Utrecht, The Netherlands;

9 <sup>4</sup>Department of Immunology and Pathology, Monash University and Alfred Hospital, Melbourne;

10 <sup>5</sup>Theoretical Biology, Utrecht University, Utrecht, The Netherlands

11 \*These authors contributed equally to this work

12 **Corresponding author:**

13 Kiki Tesselaar, PhD

14 Center for Translational Immunology

15 University Medical Center Utrecht (UMCU)

16 P.O. Box 85090, 3508 AB Utrecht, The Netherlands

17 T: +31 (0)88755394; E-mail: K.Tesselaar@umcutrecht.nl

18 **Abstract**

19 Lymphocyte numbers need to be quite tightly regulated. It is generally assumed that  
20 lymphocyte production and survival rates increase homeostatically when lymphocyte numbers  
21 decrease. This widely-accepted concept is largely based on experiments in mice. In humans,  
22 lymphocyte reconstitution usually occurs very slowly, which challenges the idea that density  
23 dependent homeostasis aids recovery from lymphopenia. Using *in vivo* deuterium labelling, we  
24 quantified lymphocyte production and survival rates in patients who underwent an autologous  
25 hematopoietic stem cell transplantation (autoHSCT). We indeed found that the production rates of  
26 most T-cell and B-cell subsets in autoHSCT-patients were 2 to 8-times higher than in healthy controls.  
27 These increased lymphocyte production rates went hand in hand with a 3 to 9-fold increase in cell loss  
28 rates, and both rates did not normalize when cell numbers did. This challenges the concept of  
29 homeostatic regulation of lymphocyte production and survival rates in humans.

30 **NOTE: This preprint reports new research that has not been certified by peer review and should not be used to guide clinical practice.**

## 31 Introduction

32 Under healthy conditions, the peripheral T- and B-cell populations are maintained at relatively  
33 stable numbers throughout life <sup>1,2</sup>. Homeostatic mechanisms are thought to regulate lymphocyte  
34 production and survival rates in a density-dependent manner. Indeed, studies in rodents have shown  
35 that lymphocyte division and survival rates increase in response to severe lymphopenic conditions <sup>3</sup>.  
36 Robust peripheral proliferation of T-cells occurs both upon adoptive cell transfer into severely  
37 lymphocyte-depleted mice, and in partially immune-depleted hosts in the absence of adoptive cell  
38 transfer, a phenomenon termed lymphopenia-induced proliferation (LIP) <sup>3-6</sup>. Similarly, rapid  
39 proliferation and extended survival of B-cells occur after adoptive cell transfer into B-cell deficient  
40 hosts and correlate with peripheral B-cell numbers <sup>7</sup>.

41 In analogy, it is generally assumed that lymphopenic conditions induce alterations in lymphocyte  
42 dynamics in humans. However, in humans full recovery of the T-cell compartment following an  
43 autologous hematopoietic stem cell (autoHSCT) is notoriously slow, often taking several years <sup>8-11</sup>.  
44 On the basis of elevated frequencies of Ki-67<sup>+</sup> cells, severe lymphopenia arising after HSCT and  
45 lymphocyte-depleting treatments has been associated with increased proliferation of naive and  
46 memory T-cells <sup>12-15</sup>. However, elevated frequencies of Ki-67<sup>+</sup> cells were shown to decline within 3 to  
47 6 months after cell depletion, despite the fact that patients were still deeply lymphopenic <sup>13-15</sup>.  
48 Furthermore, increased T-cell proliferation rates after allogeneic HSCT have been shown to correlate  
49 with the occurrence of graft-versus-host disease (GVHD) and infectious-disease-related  
50 complications <sup>14</sup>. Together, these observations question whether homeostatic mechanisms are  
51 induced to compensate for low lymphocyte numbers in humans undergoing HSCT. It remains unclear  
52 to what extent increased T-cell proliferation post-HSCT reflects a T-cell density-dependent response to  
53 lymphopenia, or an immune response triggered by therapy-related tissue damage, infectious  
54 complications, or immune activation.

55 To elucidate whether lymphocyte production and death rates in humans are regulated in a  
56 density-dependent manner, we used *in vivo* deuterium labelling to quantify the production and loss  
57 rates of different T- and B-cell subsets in patients who received an autologous HSCT (autoHSCT), and  
58 had no signs of clinically manifested infections or GVHD. Twelve months after autoHSCT, absolute  
59 numbers of CD4<sup>+</sup> T-cells and memory and natural effector B-cells in these patients were still lower than  
60 in healthy individuals, while CD8<sup>+</sup> T-cell and naive B-cell numbers had already recovered to healthy  
61 control values. Deuterium labelling revealed that the production rates of most lymphocyte subsets,  
62 even those that had already reconstituted, were significantly higher in patients post-autoHSCT than in  
63 healthy individuals. These increased rates of T- and B-cell production could only be reconciled with the

64 observed slow changes in lymphocyte numbers over time if lymphocyte loss rates were also  
65 significantly increased, impeding a timely reconstitution of the lymphocyte pool post-autoHSCT.

## 66 **Materials and Methods**

67 Complete Materials and Methods can be found as Supplementary Information.

### 68 **Patient characteristics**

69 Six patients who received an autoHSCT for the treatment of a hematologic malignancy were  
70 enrolled in the study after having provided written informed consent. Following repeated  
71 subcutaneous injections with granulocyte-colony stimulating factor (G-CSF), stem cells were obtained  
72 by leukapheresis of peripheral blood. Patients received a non T-cell depleted graft; the average number  
73 of CD34<sup>+</sup> cells transplanted was 5.03x10<sup>6</sup> cells/kg (median, 4.12; range, 1.82-12.38). Patients were  
74 included in the study between 196 and 420 days after autoHSCT, and had no signs of transplantation-  
75 related complications, severe infections (HIV, HBV, HCV), other liver disease, active uncontrolled  
76 infections (such as infectious mononucleosis), inadequate liver or kidney function, or cardiovascular  
77 disease before and during the study. Additional inclusion criteria were: fully transfusion-independent  
78 at start of the study, hemoglobin level  $\geq 6$ mmol/l, and platelet count  $\geq 50 \times 10^9$ /L. Any use of medication  
79 during the study was unrelated to the malignancy and the HSCT (Figure 1). In order to compare the  
80 phenotypes of the B- and T-cell compartments of patients to those of age-matched healthy individuals,  
81 we used data from healthy individuals from a previous study <sup>16</sup>, and additional blood samples were  
82 collected from healthy volunteers not following the labelling protocol after having provided informed  
83 consent. This study was approved by the medical ethical committee of the University Medical Center  
84 Utrecht and conducted in accordance with the Helsinki Declaration.

### 85 ***In vivo* deuterium labelling**

86 *In vivo* deuterium labelling was performed as previously described with small adaptations <sup>16</sup>.  
87 Briefly, patients received an oral ramp-up dose of 7.5 ml of heavy water (<sup>2</sup>H<sub>2</sub>O, 99.8% enriched,  
88 Cambridge Isotope Laboratories) per kg body water on the first day of the study, and drank a daily  
89 maintenance dose of 1.25 ml <sup>2</sup>H<sub>2</sub>O per kg body water for 6 weeks. To reduce the study burden, the  
90 labelling period of patients was 3 weeks shorter than the previously used labelling period for healthy  
91 individuals.

### 92 **Cell isolation, flow cytometry and cell sorting**

93 Peripheral blood mononuclear cells were obtained by Ficoll-Paque (GE Healthcare, Little  
94 Chalfont, UK) density gradient centrifugation from heparinized blood. Granulocytes were obtained by  
95 2 cycles of erythrocyte lysis (155mM NH<sub>4</sub>Cl, 10mM KHCO<sub>3</sub>, 0.1mM Na<sub>2</sub>-EDTA, pH=7.0) of the

96 granulocyte/erythrocyte layer. To determine baseline enrichment, total peripheral blood mononuclear  
97 cells were frozen on the first day of the study, prior to  $^2\text{H}_2\text{O}$  intake.

98 Absolute cell numbers were determined using TruCount tubes (BD Biosciences, San Jose, CA,  
99 USA), and cell cycle analysis was performed by measuring expression of Ki-67. Samples were analysed  
100 on an LSR-II or LSR-Fortessa flow cytometer using FACS Diva software (BD Biosciences).

101  $\text{CD}19^+$  naive ( $\text{IgM}^+\text{CD}27^-$ ), Ig class-switched ( $\text{IgM}^-\text{CD}27^+$ ) and  $\text{IgM}^+$  ( $\text{IgM}^+\text{CD}27^+$ ) memory B-cells  
102 and  $\text{CD}3^+\text{CD}4^+$  and  $\text{CD}3^+\text{CD}8^+$  naive ( $\text{CD}27^+\text{CD}45\text{RO}^-$ ) and memory ( $\text{CD}45\text{RO}^+$ ) T-cells were sorted on a  
103 FACS Aria II or FACS Aria III cell sorter using FACS Diva software (BD Biosciences). Flow cytometric  
104 analyses and cell sorting were always performed on freshly isolated material. Representative density  
105 dot plots and the gating strategy for TruCount analysis and cell sorting are shown in Sup. Figure 1.

## 106 **Statistical analyses**

107 Medians were compared between groups using Mann–Whitney tests. Correlations were  
108 analysed using the Spearman’s rank test (GraphPad Software, Inc). Differences with a  $p$ -value $<0.05$   
109 were considered significant.

## 110 **Results**

### 111 **Heterogeneous T-cell reconstitution kinetics post-autoHSCT**

112 To investigate whether lymphocyte production and loss depend on cell numbers during  
113 lymphopenia in humans, we quantified the production and loss rates of B- and T-cells in 6 patients who  
114 received an autoHSCT for the treatment of haematological malignancies. Patients were included in the  
115 study between 196 days and 420 days post-autoHSCT, they received deuterated water ( $^2\text{H}_2\text{O}$ ) for six  
116 weeks, and were followed for approximately one year after start of the labelling period (Figure 1).  
117 *Patient B* withdrew from the study 10 weeks after the start of  $^2\text{H}_2\text{O}$  labelling due to infectious  
118 complications unrelated to participation in the study. All other patients had no complications that  
119 needed treatment during the study follow-up, which was supported by CRP levels in the normal range  
120 (Sup. Figure 2).

121 The sub-optimal T-cell recovery observed in the peripheral blood of patients post auto-HSCT  
122 (Figure 2A) was largely due to the slow reconstitution of  $\text{CD}4^+$  T-cells (Figure 2B). At the start of  $^2\text{H}_2\text{O}$   
123 labelling,  $\text{CD}8^+$  T-cell numbers had reached normal levels in most patients, whereas  $\text{CD}4^+$  T-cell  
124 numbers remained below normal levels even 1.5 years post-autoHSCT. This resulted in an inverse  
125  $\text{CD}4:\text{CD}8$  ratio in all patients except for *patient C* (Figure 2C), who experienced extremely slow  $\text{CD}8^+$  T-  
126 cell reconstitution (Figure 2D). Naive ( $\text{CD}45\text{RO}^-\text{CD}27^+$ )  $\text{CD}4^+$  T-cell numbers remained below normal  
127 levels throughout the 2-year follow-up period, whereas memory ( $\text{CD}45\text{RO}^+$ )  $\text{CD}4^+$  T-cells reached the

128 lower range of normal levels around 400 days post-autoHSCT (Figure 2B). Naive and memory CD8<sup>+</sup> T-  
129 cell numbers were at normal or supra-normal levels at the start of the study in all patients except for  
130 *patient C* (Figure 2D). In line with cell numbers, for most patients the fractions of naive cells, central  
131 memory (CM, CD45RO<sup>+</sup>CD27<sup>+</sup>), effector memory (EM, CD45RO<sup>+</sup>CD27<sup>-</sup>) and effector (CD45RO<sup>-</sup>CD27<sup>-</sup>) T-  
132 cells differed from those in healthy controls and varied slightly over time (Figure 2E and Sup. Figure 3).

133 Because it is generally assumed that during lymphopenia the availability of growth and survival  
134 factors increases, which has in particular been shown for IL-7 plasma levels<sup>18–22</sup>, we also determined  
135 plasma levels of IL-7 and IL-15 between 12 and 24 months post-autoHSCT. Despite the CD4<sup>+</sup> T-cell  
136 lymphopenia observed in these patients, their plasma concentrations of IL-7 and IL-15 and several  
137 other cytokines were in the range of those of healthy controls (Sup. Figure 2).

### 138 **Increased CD4<sup>+</sup> and CD8<sup>+</sup> T-cell production rates post-autoHSCT**

139 To investigate whether low CD4<sup>+</sup> T-cell numbers were associated with increased T-cell  
140 production rates, we compared the level of deuterium enrichment in the DNA of the different T-cell  
141 subsets between patients and controls. Deuterium enrichment analysis showed a relatively high level  
142 of label incorporation in patients, despite the fact that the labelling period was 3 weeks shorter for  
143 patients than for controls (Figure 3A). Using mathematical modelling we estimated the production  
144 rates of the different T-cell subsets (i.e. the number of new cells produced per day, coming from a  
145 source or peripheral cell division, divided by the number of resident cells in the population). We found  
146 that the production rates of naive and memory CD4<sup>+</sup> T-cells were, respectively, 6-times and 3-times  
147 higher in patients than in controls. For naive and memory CD8<sup>+</sup> T-cells, the estimated production rates  
148 were approximately 8- and 4-times higher in patients compared to controls (Figure 3B, Sup. Table 1),  
149 despite the fact that absolute CD8<sup>+</sup> T-cell numbers had already recovered to healthy levels 12 months  
150 post-transplantation.

### 151 **Increased proliferation of naive but not memory CD4<sup>+</sup> and CD8<sup>+</sup> T cells**

152 T-cell production rates as measured by deuterium labelling may reflect cell division of the subset  
153 of interest or an influx of cells from a source (e.g. by thymic output) or from another subset (e.g.  
154 through lymphocyte differentiation). To distinguish between these options, we first measured Ki-67  
155 expression, a marker for peripheral cell division, of all lymphocyte subsets. The fraction of Ki-67<sup>+</sup> cells  
156 within the naive CD4<sup>+</sup> and CD8<sup>+</sup> T-cell pools was significantly higher in patients compared to controls  
157 (Figure 4A). For the memory T-cell subsets, in contrast, the fraction of Ki-67<sup>+</sup> cells of patients did not  
158 differ significantly from those of controls (Figure 4A). This suggests that the increased production rates  
159 of memory CD4<sup>+</sup> and CD8<sup>+</sup> T-cells may occur due to an increased influx from naive T-cells into the  
160 memory compartment, rather than increased T-cell division within the memory T-cell pools.

161 Besides increased cell division in the naive T-cell pool, increased naive T-cell production rates  
162 post-autoH SCT could in theory also be due to increased thymic output. T-cell receptor excision  
163 circles (TRECs) are commonly measured to estimate thymopoiesis. Because the average TREC  
164 content per T-cell declines with age<sup>23-25</sup>, we measured TREC contents of naive T-cells from patients,  
165 cord blood, and young (on average 23 years of age) and aged (on average 68 years of age) healthy  
166 individuals<sup>16</sup>. The average TREC content of naive CD4<sup>+</sup> T-cells in patients was approximately 10-fold  
167 higher than in aged controls, and not significantly different from that of young individuals and cord  
168 blood (Figure 4B), even though all but one of the patients were more than 50 years of age. For naive  
169 CD8<sup>+</sup> T-cells, the average TREC content in patients was in the range of young and aged controls (Figure  
170 4B). We also measured CD31 expression on naive CD4<sup>+</sup> T-cells, as CD31<sup>+</sup>CD4<sup>+</sup> T cells are known to be  
171 enriched in recent thymic emigrants (RTEs)<sup>26,27</sup>. The fraction of CD31<sup>+</sup> cells within the naive CD4<sup>+</sup> T-  
172 cell population was slightly higher in patients than in aged controls and slightly lower than in young  
173 controls and cord blood (Figure 4C, Sup. Figure 4). For naive T-cells, the combined Ki-67, TREC and  
174 CD31 data suggest that the increased T-cell production is due to increased T-cell division, and that the  
175 increased average TREC contents and percentages of CD31<sup>+</sup> cells may be a direct consequence of  
176 normal thymic output entering a smaller T-cell pool<sup>28</sup>.

#### 177 **Heterogeneous B-cell reconstitution kinetics post-autoH SCT**

178 Next, we studied the changes in B-cell dynamics following autoH SCT. Although total CD19<sup>+</sup> B-  
179 cell numbers and naive (IgM<sup>+</sup>CD27<sup>-</sup>) B-cell numbers had already reached normal or even supra-normal  
180 levels by day 200 post-autoH SCT, Ig class-switched (IgM<sup>-</sup>CD27<sup>+</sup>) and IgM<sup>+</sup> (IgM<sup>+</sup>CD27<sup>+</sup>) memory B-cell  
181 numbers in most patients were still below, or in the lower range of, those of healthy controls  
182 throughout the study period (Figure 5A, 5B and Sup. Figure 5).

#### 183 **Increased production rates of B-cells post-autoH SCT**

184 We analysed the deuterium enrichment of the different B-cell subsets to study whether B-cell  
185 production rates were increased for subsets which were still low in cell numbers (Figure 6A). The  
186 production rates of Ig switched-memory B-cells and IgM<sup>+</sup> memory B-cells were 3.5-times and 5-times  
187 higher than in controls, respectively (Figure 6B, Sup. Table 1). Also the production rate of naive B-cells,  
188 a population that had already reconstituted to supra-normal levels, remained significantly higher than  
189 in healthy controls (Figure 6B, Sup. Table 1).

190 Because B-cell production may depend on peripheral B-cell division and on *de novo* bone  
191 marrow output, we measured Ki-67 expression and kappa-deleting recombination excision circles  
192 (KRECs), in an attempt to estimate bone marrow output. The percentages of dividing, i.e. Ki-67<sup>+</sup>, cells  
193 within IgM<sup>+</sup> and Ig switched-memory B-cells were significantly higher in patients than in healthy

194 individuals (Figure 6C). In contrast, the fraction of Ki-67<sup>+</sup> cells within the naive B-cell subset was similar  
195 between patients and controls (Figure 6C). Although naive B-cell peripheral division rates were not  
196 increased post-autoHSCT, their production rates were 2-times higher than in controls. The replication  
197 history (measured as number of cell divisions) of the naive B-cell subsets in patients tended to be lower  
198 than in controls (although not significantly), suggesting that the output of naive B-cells from the bone  
199 marrow rather than their peripheral proliferation rate was increased after autoHSCT (Figure 6D).

## 200 **Increased lymphocyte production rates are counteracted by increased lymphocyte loss rates**

201 The increased lymphocyte production rates that we observed in patients after autoHSCT may at  
202 first sight suggest that, also in humans, lymphocyte production is regulated in a density-dependent  
203 manner. The observation that lymphocyte production rates were also elevated for subsets for which  
204 cell numbers had already normalized, however, challenges this interpretation. Another observation  
205 challenging this interpretation is that for most subsets, lymphocyte numbers increased very little over  
206 time, despite the significant increase in lymphocyte production. This suggests that lymphocyte loss  
207 rates were also significantly increased after autoHSCT.

208 To estimate the average loss rates of all lymphocyte subsets (i.e. the number of cells lost per  
209 day, by cell death, migration or differentiation, divided by the number of resident cells in the  
210 population), we used the average lymphocyte production rates estimated from the deuterium labelling  
211 experiments and an exponential function to describe the changes in cell numbers of each lymphocyte  
212 subset over time (see Sup. material and methods). For most T-cell and B-cell subsets the average loss  
213 rate was approximately 3 to 5-times higher post-autoHSCT than in healthy individuals (Figure 7, Sup.  
214 Table 2). For naive CD8<sup>+</sup> T-cells the average loss rate was even 9.5-times higher in patients than in  
215 healthy individuals (Figure 7, Sup. Table 2). Thus, despite the fact that production rates are clearly  
216 increased in patients post-autoHSCT, this increased production goes hand in hand with increased  
217 lymphocyte loss rates, thereby challenging the view that it reflects a homeostatic response to low  
218 lymphocyte numbers.

## 219 **Discussion**

220 From a homeostatic viewpoint, a response to low lymphocyte numbers could take the form of  
221 increased lymphocyte production or decreased lymphocyte loss. Based on the observation that severe  
222 lymphopenia in mice is associated with increased peripheral proliferation<sup>3-5,20</sup>, it is widely believed  
223 that lymphocyte production rates are increased when cell numbers are low. We have previously shown  
224 that naive T-cell turnover rates do not increase to compensate for the at least 10-fold decline in thymic  
225 output in elderly individuals<sup>16</sup>. This could be due to the relatively small degree of naive T-cell loss

226 observed during healthy ageing. Under more severe conditions of lymphopenia in humans, high  
227 frequencies of proliferating lymphocytes have been observed, but these have been linked to immune  
228 activation and clinical events, e.g. GVHD and opportunistic infections<sup>14</sup>. Thus, there is no convincing  
229 evidence that homeostatic regulation of lymphocyte production and loss occurs in humans.

230 Our deuterium labelling study shows that in patients receiving an autoHSCT, in the absence of  
231 GVHD, clinically manifested infections and transplantation-related complications, the production rates  
232 of most T- and B-cell subsets were significantly increased 12 months after transplantation. Increased  
233 lymphocyte production following lymphodepletion has generally been interpreted as evidence for a  
234 density-dependent response to low lymphocyte numbers<sup>12,13,15,29,30</sup>. Our study challenges this view for  
235 two reasons: i) T- and B-cell production rates did not normalize when cell numbers did, and ii)  
236 lymphocyte loss rates were also increased post-autoHSCT. This suggests that the increase in  
237 lymphocyte production rates in autoHSCT patients was not simply a homeostatic response to low cell-  
238 numbers. Other determinants, such as repertoire diversity or the clonality of the T-cell pool might also  
239 play a role. In addition, despite the fact that the patients in our study were included up to 12 months  
240 post-transplantation and were selected on the basis of being in good health, we cannot exclude that  
241 the increased rates of lymphocyte production and loss in these patients reflect HSCT-related  
242 complications, such as the impact of initial chemo-therapy and conditioning-therapy or sub-clinical  
243 infections and inflammation, which may have gone unnoticed.

244 The observation that lymphocyte loss rates were increased post-autoHSCT is remarkable in the  
245 light of the widely held view that homeostatic mechanisms could take the form of increased  
246 lymphocyte survival. This concept is supported by the observation that the availability of pro-survival  
247 and anti-apoptotic factors, such as IL-7<sup>31</sup>, increases during lymphopenia. We found that lymphocyte  
248 loss rates were up to 10-fold increased after autoHSCT. This is in line with previous human studies on  
249 T-cell survival after allogenic HSCT, which consistently reported that the fraction of pro-apoptotic cells  
250 increases following transplantation<sup>15,32-34</sup>. Although this suggests that intervention with lymphocyte  
251 survival after HSCT may aid lymphocyte reconstitution, in our study, different factors may have  
252 contributed to the loss of cells from the peripheral blood. Cells may have been lost from the circulation  
253 by cell death, but also by lymphocyte differentiation and/or migration to the tissues. Further studies  
254 need to clarify whether lymphocyte reconstitution occurs at similar rates in blood and tissues, or  
255 whether lymphocyte recruitment to the tissues may be a key factor influencing the loss of lymphocytes  
256 from the blood following autoHSCT.

257 Consistent with previous reports<sup>10,15,35</sup>, we found that 12 months post-autoHSCT, CD4<sup>+</sup> T-cell  
258 numbers were below the normal range while CD8<sup>+</sup> T-cells recovered more rapidly. Deuterium labelling  
259 in patients revealed that the average production rates of most T-cell subsets were significantly  
260 increased following autoHSCT. This increase was especially evident for naive T-cells. The high



261 percentage of Ki-67<sup>+</sup> naive T-cells post-autoHSCT suggests that increased naive T-cell production is to  
262 a large extent explained by increased peripheral T-cell proliferation. Memory T-cell production rates  
263 (based on deuterium enrichment) were also higher in patients compared to controls, while Ki-67  
264 expression suggested that memory CD4<sup>+</sup> and CD8<sup>+</sup> T-cell proliferation rates were not increased after  
265 autoHSCT. This seeming contradiction may be explained by the fact that Ki-67, a snapshot marker, may  
266 be less sensitive to detect differences in T-cell proliferation than long-term *in vivo* deuterium labelling.  
267 Alternatively, the increased production rate of memory T cells post-autoHSCT may be due to increased  
268 transition of naive T cells into the memory T-cell population. In mice it has been demonstrated that  
269 naive T-cells adoptively transferred into immunodeficient animals can undergo division without  
270 cognate antigen stimulation, thereby acquiring a memory phenotype<sup>36,37</sup>.

271 If a significant part of cell production in a certain lymphocyte subset (e.g. the memory subset) is  
272 indeed due to an influx from another lymphocyte subset (e.g. the naive subset), the increased  
273 production rates that we observed may either reflect a true increase in cell production, or a normal  
274 influx of cells entering a smaller lymphocyte population. To distinguish between these options, for  
275 each lymphocyte subset and each individual, we also calculated the total number of cells produced per  
276 day (i.e. coming from a source and/or from peripheral cell division), by multiplying the average  
277 production rate of each lymphocyte subset with the median cell number of that subset, and compared  
278 these values to those in healthy controls (data not shown). We found that total daily lymphocyte  
279 production was as high as in healthy controls for naive CD4<sup>+</sup> T cells and higher than in healthy controls  
280 for all other lymphocyte subsets, suggesting that the increased lymphocyte production rates post-  
281 autoHSCT truly reflected increased T-cell proliferation and/or an increased influx from another  
282 lymphocyte compartment.

283 Measuring thymopoiesis and the contribution of recent thymic emigrants to the naive T-cell  
284 pool after HSCT is not straightforward. Although increased TREC contents at first sight seem  
285 suggestive for increased thymic output, T-cells bearing TRECs may in fact be overrepresented in the  
286 peripheral T-cell pool post-transplantation when cell numbers are low<sup>28</sup>. Hence, for naive CD4<sup>+</sup> T cells,  
287 whose numbers had not yet normalized, increased average TREC contents may incorrectly be  
288 interpreted as evidence for increased thymic output. The finding that the average TREC content of  
289 naive CD4<sup>+</sup> T-cells following autoHSCT was higher than in age-matched controls provides no evidence  
290 that thymic output following transplantation was higher than in healthy controls, but does imply that  
291 the thymus had become functional again within 12 months after intense conditioning for autoHSCT.  
292 The fact that the average TREC content of naive CD4<sup>+</sup> T-cells, but not that of naive CD8<sup>+</sup> T-cells, was  
293 higher in patients than in healthy individuals may reflect differences in the degree of depletion of naive  
294 CD4<sup>+</sup> and CD8<sup>+</sup> T-cells. Alternatively, it might reflect differences in the way CD4<sup>+</sup> and CD8<sup>+</sup> T-cells are  
295 generated. In support of the latter explanation, repertoire analyses in patients receiving an autoHSCT

296 for the treatment of autoimmune diseases have suggested that CD4<sup>+</sup> T-cells largely arise *de novo*, since  
297 most CD4<sup>+</sup> T-cell clones post-autoHSCT were not present at baseline, while CD8<sup>+</sup> T-cells mainly expand  
298 from cells that were already circulating pre-transplantation<sup>38-40</sup>.

299 To study in a population other than T-cells whether lymphocyte production and loss rates in  
300 humans are regulated in a density-dependent manner, we quantified the production and loss rates of  
301 different B-cell subsets. In line with previous reports<sup>41-43</sup>, we found that 12 months after  
302 transplantation, naive B-cell numbers had reconstituted to healthy (or even higher than healthy)  
303 control values, while Ig class-switched and IgM<sup>+</sup> memory B-cells had not yet fully recovered. The  
304 delayed reconstitution of Ig class-switched and IgM<sup>+</sup> memory B-cells has typically been attributed to  
305 treatment-related damage to secondary lymphoid organs, which may hamper the formation of  
306 germinal centers essential for somatic hypermutation and isotype switching<sup>42</sup>. Also for naive, Ig class-  
307 switched, and IgM<sup>+</sup> memory B-cells, we found that not only production rates but also cell loss rates  
308 were increased 12 months post-autoHSCT, further supporting our conclusion that increased  
309 lymphocyte production rates do not simply reflect a homeostatic response to low lymphocyte  
310 numbers.

311 In brief, our findings show that despite the slow reconstitution of lymphocytes in autoHSCT  
312 patients, lymphocyte production rates are increased. Since this increased production goes hand in  
313 hand with increased cell loss, and does not normalize when cell numbers do, it is not simply due to  
314 homeostatic mechanisms. Future studies should address whether the dynamics of lymphocytes after  
315 autoHSCT normalize in the long run, what drives the increase in lymphocyte production and loss rates  
316 during immune reconstitution, and to what extent immune reconstitution in the tissues occurs.

## 317 **Acknowledgments**

318 We thank the patients for their participation in this study, Jeroen F. van Velzen, Pien A.J. van der Burght  
319 and Gerrit Spierenburg for assistance with cell sorting, Laura Ackermans for theoretical input, Lyanne  
320 Derksen for critically reading the manuscript, Mr Benjamin Bartol and Ms Pei Mun Aui for technical  
321 support, and the nurses from the Julius Center Trial Unit for taking care of study participants.

## 322 **Funding**

323 The research leading to these results has received funding from the European Union Seventh  
324 Framework Programme (FP7/2007–2013) through the Marie-Curie Action “Quantitative T cell  
325 Immunology” Initial Training Network, with reference number FP7-PEOPLE-2012-ITN 317040-QuanTI  
326 and from the Landsteiner Foundation for Blood Transfusion Research (LSBR grant 0812).

## 327 **Authorship**

328 Contribution: MB-P, VvH, JD, JB and KT designed the experiments; MB-P and VvH performed the  
329 experiments; LvdW and AJ selected and included the patients; MB-P, VH, JD, RdB, JB and KT analysed  
330 and interpreted data; JD, RdB, and JB performed mathematical modelling; and all authors wrote and  
331 approved the manuscript.

## 332 **Conflict-of-interest statements**

333 The authors declare no competing financial interests.

334

## 335 **References**

- 336 1. Lin Y, Kim J, Metter EJ, et al. Changes in blood lymphocyte numbers with age in vivo and their association  
337 with the levels of cytokines/cytokine receptors. *Immun. Ageing*. 2016;13(1):24.
- 338 2. Wertheimer AM, Bennett MS, Park B, et al. Aging and Cytomegalovirus Infection Differentially and Jointly  
339 Affect Distinct Circulating T Cell Subsets in Humans. *J. Immunol*. 2014;192(5):2143–2155.
- 340 3. Freitas AA, Rocha B. Population Biology of Lymphocytes: The Flight for Survival. *Annu. Rev. Immunol*.  
341 2000;18(1):83–111.
- 342 4. Miller R a, Stutman O. T cell repopulation from functionally restricted splenic progenitors: 10,000-fold  
343 expansion documented by using limiting dilution analyses. *J. Immunol*. 1984;133(6):2925–32.
- 344 5. Bell EB, Sparshott SM, Drayson MT, Ford WL. The stable and permanent expansion of functional T  
345 lymphocytes in athymic nude rats after a single injection of mature T cells. *J. Immunol*. 1987;139(5):1379–  
346 84.
- 347 6. Neujahr DC, Chen C, Huang X, et al. Accelerated Memory Cell Homeostasis during T Cell Depletion and  
348 Approaches to Overcome It. *J. Immunol*. 2006;176(8):4632–4639.
- 349 7. Gaudin E, Rosado M, Agenes F, McLean A, Freitas AA. B-cell homeostasis, competition, resources, and  
350 positive selection by self-antigens. *Immunol. Rev*. 2004;197:102–15.
- 351 8. Heining C, Spyridonidis A, Bernhardt E, et al. Lymphocyte reconstitution following allogeneic  
352 hematopoietic stem cell transplantation: a retrospective study including 148 patients. *Bone Marrow*  
353 *Transplant*. 2007;39(10):613–622.
- 354 9. Ringhoffer S, Rojewski M, Dohner H, Bunjes D, Ringhoffer M. T-cell reconstitution after allogeneic stem  
355 cell transplantation: assessment by measurement of the sjTREC/ TREC ratio and thymic naive T cells.  
356 *Haematologica*. 2013;98(10):1600–1608.
- 357 10. Bosch M, Khan FM, Storek J. Immune reconstitution after hematopoietic cell transplantation. *Curr. Opin*.  
358 *Hematol*. 2012;19(4):324–335.
- 359 11. Williams KM, Hakim FT, Gress RE. T cell immune reconstitution following lymphodepletion. *Semin*.

- 360 *Immunol.* 2007;19(5):318–330.
- 361 12. Jones JL, Thompson SAJ, Loh P, et al. Human autoimmunity after lymphocyte depletion is caused by  
362 homeostatic T-cell proliferation. *Proc. Natl. Acad. Sci.* 2013;110(50):20200–20205.
- 363 13. Bouvy AP, Kho MML, Klepper M, et al. Kinetics of homeostatic proliferation and thymopoiesis after ratg  
364 induction therapy in kidney transplant patients. *Transplantation.* 2013;96(10):904–913.
- 365 14. Hazenberg MD. T-cell receptor excision circle and T-cell dynamics after allogeneic stem cell  
366 transplantation are related to clinical events. *Blood.* 2002;99(9):3449–3453.
- 367 15. Alho AC, Kim HT, Chammas MJ, et al. Unbalanced recovery of regulatory and effector T cells after  
368 allogeneic stem cell transplantation contributes to chronic GVHD. *Blood.* 2017;127(5):646–658.
- 369 16. Westera L, van Hoven V, Drylewicz J, et al. Lymphocyte maintenance during healthy aging requires no  
370 substantial alterations in cellular turnover. *Aging Cell.* 2015;14(2):219–227.
- 371 17. R Core Team (R Foundation for Statistical Computing). R: A Language and Environment for Statistical  
372 Computing. 2018;
- 373 18. Van Gent R, Schadenberg AWL, Otto SA, et al. Long-term restoration of the human T-cell compartment  
374 after thymectomy during infancy: A role for thymic regeneration? *Blood.* 2011;118(3):627–634.
- 375 19. Sauce D, Larsen M, Fastenackels S, et al. Lymphopenia-Driven Homeostatic Regulation of Naive T Cells in  
376 Elderly and Thymectomized Young Adults. *J. Immunol.* 2012;189(12):5541–5548.
- 377 20. Fry TJ, Connick E, Falloon J, et al. A potential role for interleukin-7 in T-cell homeostasis. *Blood.*  
378 2001;97(10):2983–90.
- 379 21. Napolitano LA, Grant RM, Deeks SG, et al. Increased production of IL-7 accompanies HIV-1–mediated T-  
380 cell depletion: implications for T-cell homeostasis. *Nat. Med.* 2001;7(1):73–79.
- 381 22. Bolotin E, Annett G, Parkman R, Weinberg K. Serum levels of IL-7 in bone marrow transplant recipients:  
382 relationship to clinical characteristics and lymphocyte count. *Bone Marrow Transplant.* 1999;23(8):783–  
383 788.
- 384 23. Douek DC, McFarland RD, Keiser PH, et al. Changes in thymic function with age and during the treatment  
385 of HIV infection. *Nature.* 1998;396(6712):690–695.
- 386 24. Hazenberg MD, Otto SA, Cohen Stuart JW, et al. Increased cell division but not thymic dysfunction rapidly  
387 affects the T-cell receptor excision circle content of the naive T cell population in HIV-1 infection. *Nat.*  
388 *Med.* 2000;6(9):1036–42.
- 389 25. Hazenberg MD, Verschuren MC, Hamann D, Miedema F, Dongen JJ. T cell receptor excision circles as  
390 markers for recent thymic emigrants: Basic aspects, technical approach, and guidelines for  
391 interpretation. *J. Mol. Med.* 2001;79(11):631–640.
- 392 26. Kohler S, Thiel A. Life after the thymus: CD31+ and CD31- human naive CD4+ T-cell subsets. *Blood.*  
393 2009;113(4):769–774.
- 394 27. van den Broek T, Borghans JAM, van Wijk F. The full spectrum of human naive T cells. *Nat. Rev. Immunol.*  
395 2018;18(June):
- 396 28. Hazenberg MD, Borghans JAM, de Boer RJ, Miedema F. Thymic output: a bad TREC record. *Nat. Immunol.*  
397 2003;4(2):97–99.

- 398 29. Havenith SHC, Remmerswaal EBM, Bemelman FJ, et al. Rapid T cell repopulation after rabbit anti-  
399 thymocyte globulin (rATG) treatment is driven mainly by cytomegalovirus. *Clin. Exp. Immunol.*  
400 2012;169(3):292–301.
- 401 30. Bouvy AP, Klepper M, Betjes MGH, et al. Alemtuzumab as Antirejection Therapy. *Transplant. Direct.*  
402 2016;2(6):e83.
- 403 31. Ponchel F, Cuthbert RJ, Goëb V. IL-7 and lymphopenia. *Clin. Chim. Acta.* 2011;412(1–2):7–16.
- 404 32. Brugnoli D, Airò P, Pennacchio M, et al. Immune reconstitution after bone marrow transplantation for  
405 combined immunodeficiencies: down-modulation of Bcl-2 and high expression of CD95/Fas account for  
406 increased susceptibility to spontaneous and activation-induced lymphocyte cell death. *Bone Marrow*  
407 *Transplant.* 1999;23(5):451–457.
- 408 33. Lin MT, Tseng LH, Frangoul H, et al. Increased apoptosis of peripheral blood T cells following allogeneic  
409 hematopoietic cell transplantation. *Blood.* 2000;95(12):3832–9.
- 410 34. Poulin J-F. Evidence for adequate thymic function but impaired naive T-cell survival following allogeneic  
411 hematopoietic stem cell transplantation in the absence of chronic graft-versus-host disease. *Blood.*  
412 2003;102(13):4600–4607.
- 413 35. Storek J, Geddes M, Khan F, et al. Reconstitution of the immune system after hematopoietic stem cell  
414 transplantation in humans. *Semin. Immunopathol.* 2008;30(4):425–37.
- 415 36. Cho BK, Rao VP, Ge Q, Eisen HN, Chen J. Homeostasis-stimulated proliferation drives naive T cells to  
416 differentiate directly into memory T cells. *J. Exp. Med.* 2000;192(4):549–56.
- 417 37. Goldrath AW, Bogatzki LY, Bevan MJ. Naive T cells transiently acquire a memory-like phenotype during  
418 homeostasis-driven proliferation. *J. Exp. Med.* 2000;192(4):557–64.
- 419 38. Muraro PA, Douek DC, Packer A, et al. Thymic output generates a new and diverse TCR repertoire after  
420 autologous stem cell transplantation in multiple sclerosis patients. *J. Exp. Med.* 2005;201(5):805–816.
- 421 39. Muraro PA, Robins H, Malhotra S, et al. T cell repertoire following autologous stem cell transplantation  
422 for multiple sclerosis. *J. Clin. Invest.* 2014;124(3):1168–72.
- 423 40. Dubinsky AN, Burt RK, Martin R, Muraro PA. T-cell clones persisting in the circulation after autologous  
424 hematopoietic SCT are undetectable in the peripheral CD34+ selected graft. *Bone Marrow Transplant.*  
425 2010;45(2):325–331.
- 426 41. Burns LJ, Weisdorf DJ, DeFor TE, et al. IL-2-based immunotherapy after autologous transplantation for  
427 lymphoma and breast cancer induces immune activation and cytokine release: A phase I/II trial. *Bone*  
428 *Marrow Transplant.* 2003;32(2):177–186.
- 429 42. Avanzini MA, Locatelli F, Santos C Dos, et al. B lymphocyte reconstitution after hematopoietic stem cell  
430 transplantation: functional immaturity and slow recovery of memory CD27+ B cells. *Exp. Hematol.*  
431 2005;33(4):480–486.
- 432 43. Bemark M, Holmqvist J, Abrahamsson J, Mellgren K. Translational Mini-Review Series on B cell subsets in  
433 disease. Reconstitution after haematopoietic stem cell transplantation - revelation of B cell  
434 developmental pathways and lineage phenotypes. *Clin. Exp. Immunol.* 2012;167(1):15–25.

435 **Figure legends**

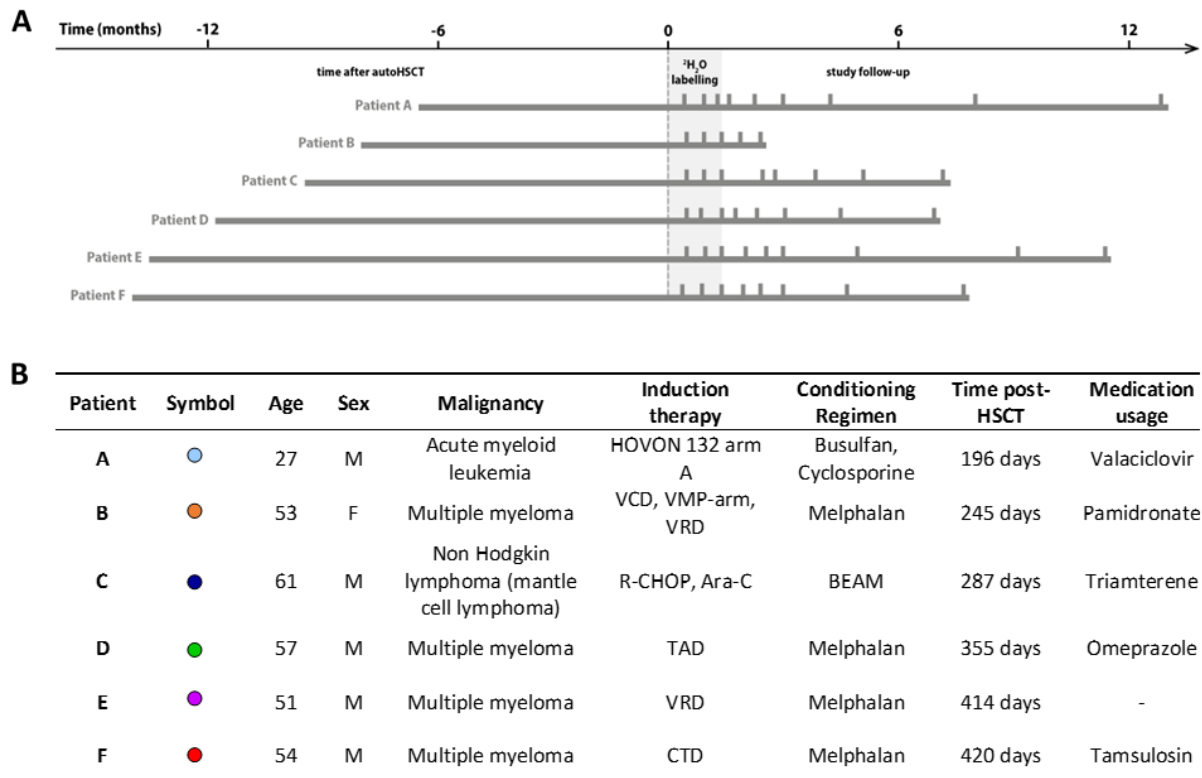

436

437 **Figure 1. Study protocol timeline and patient characteristics. (A)** Summary figure depicting the study  
 438 time line of every patient. Patients are centred by start of  $^2\text{H}_2\text{O}$  labelling. The left bar indicated the  
 439 time between the autologous hematopoietic stem cell transplantation (autoHSCT) and the start of the  
 440 labelling period, the grey area indicates the 6 weeks  $^2\text{H}_2\text{O}$  labelling period, the right bar provides the  
 441 follow up period and the vertical bars indicate the blood sampling time points. **(B)** Patient  
 442 characteristics. Age=Age at start  $^2\text{H}_2\text{O}$  labelling; M=Male; F=Female; Time post-HSCT=Reconstitution  
 443 period at start  $^2\text{H}_2\text{O}$  labelling; Medication usage=Medication during the study; HOVON 132 arm A  
 444 (Idarubicin, Ara-C (Cytarabine), Daunorubicin); VCD (Bortezomib, Cyclophosphamide, Dexamethason);  
 445 VMP (Bortezomib, Melphalan, Prednisone); VRD (Bortezomib, lenalidomide, dexamethasone); R-CHOP  
 446 (Rituximab, Cyclophosphamide, Adriamycin, Vincristin, Prednisone); Ara-C (Cytarabine), TAD  
 447 (Thalidomide, Adriamycin, Dexamethasone); CTD (Carfilzomib, Thalidomide, Dexamethasone); BEAM  
 448 (Carmustine, Etoposide, Ara-C (Cytarabine), Melphalan). For absolute leukocytes, neutrophils,  
 449 lymphocytes and monocytes numbers see Sup. Figure 6.

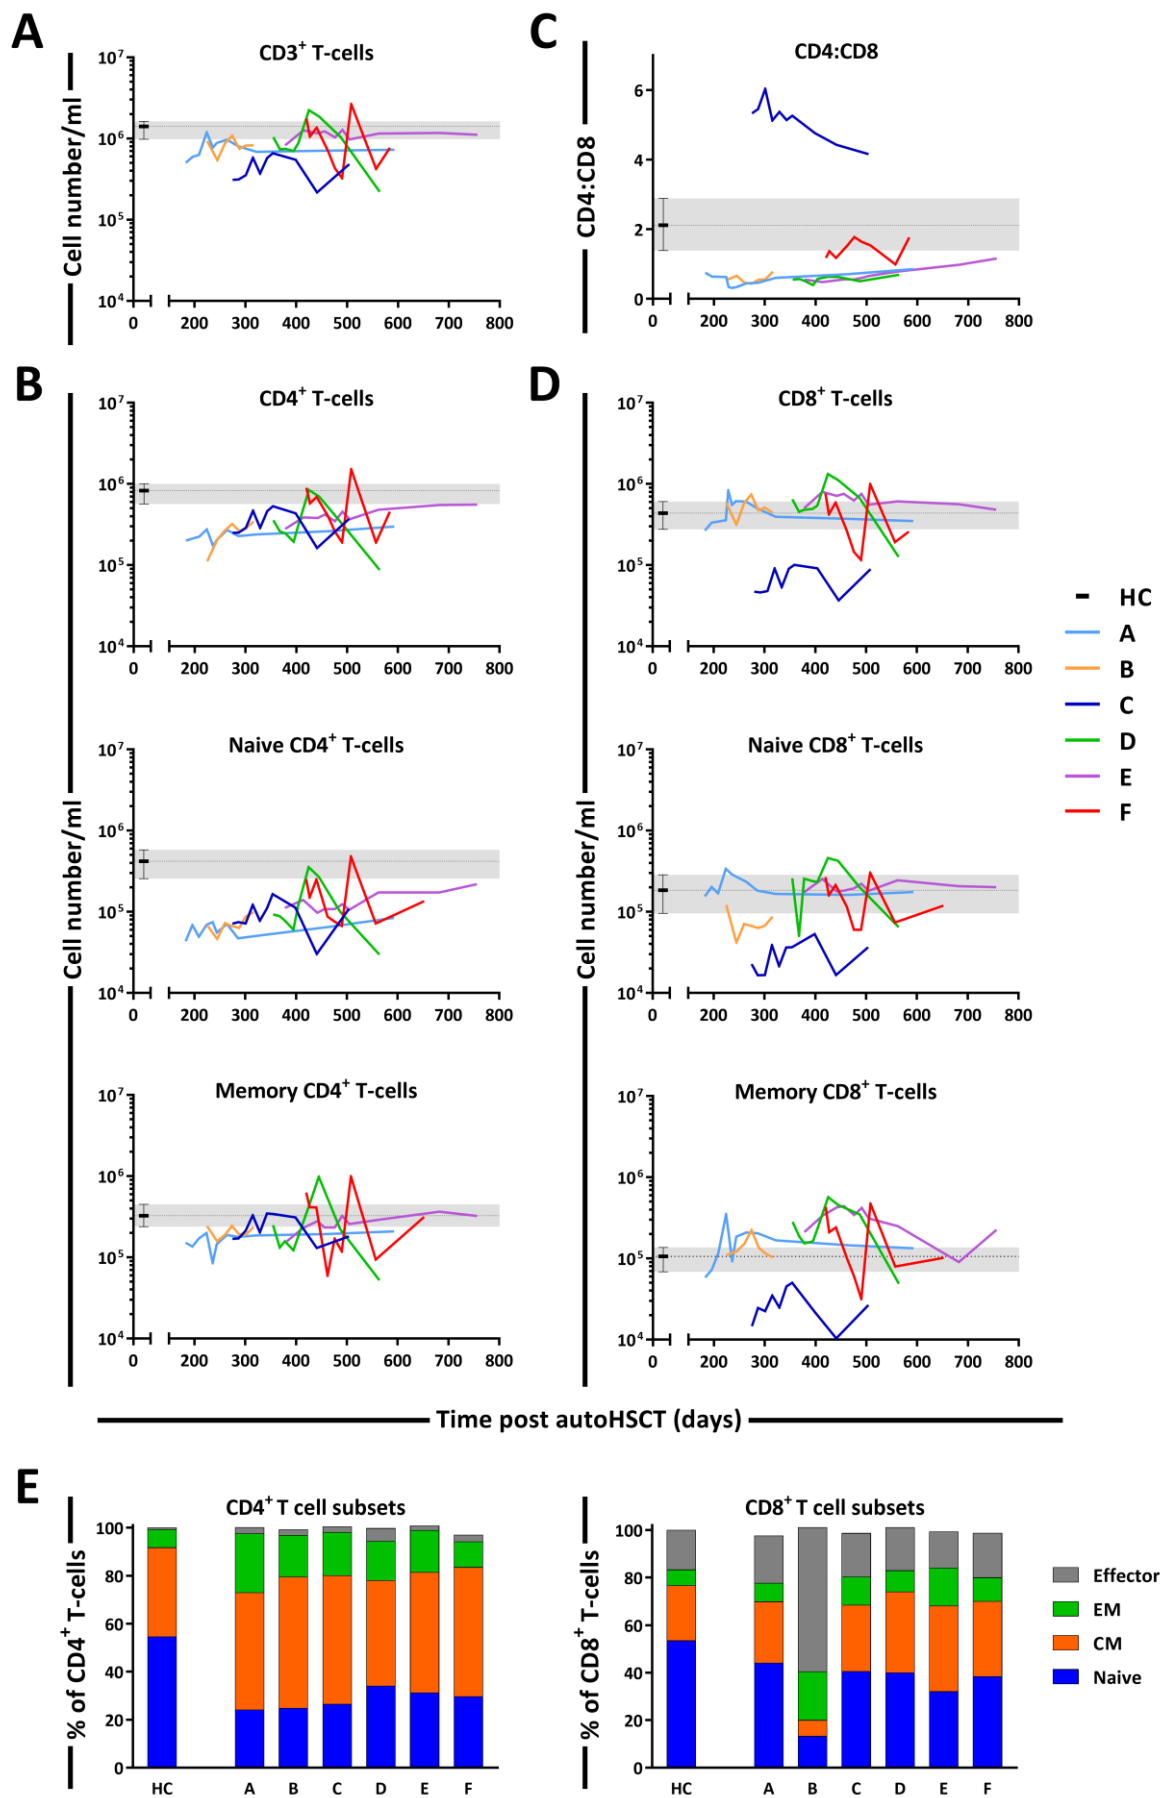

451 **Figure 2. T-cell reconstitution following autoHSCT. (A)** Absolute numbers (cells per milliliter) of total  
452 CD3<sup>+</sup> T-cells. **(B)** Absolute numbers (cells per milliliter) of CD4<sup>+</sup> T-cells (CD3<sup>+</sup>CD4<sup>+</sup>), naive (CD27<sup>+</sup>CD45RO<sup>-</sup>  
453 ) and memory (CD45RO<sup>+</sup>) CD4<sup>+</sup> T-cells. **(C)** CD4:CD8 ratio. **(D)** Absolute numbers (cells per milliliter) of  
454 CD8<sup>+</sup> T-cells (CD3<sup>+</sup>CD8<sup>+</sup>), naive (CD27<sup>+</sup>CD45RO<sup>-</sup>) and memory (CD45RO<sup>+</sup>) CD8<sup>+</sup> T-cells. **(A-D)** Graphs  
455 show the absolute cell counts per milliliter or the CD4:CD8 ratio in autoHSCT patients (patients A to F)  
456 over time from for the duration of the study, and the median and the corresponding IR for HCs (healthy  
457 controls, grey area and whisker bars). **(E)** Bar graphs show the median percentage of naive  
458 (CD27<sup>+</sup>CD45RO<sup>-</sup>), central memory (CM, CD27<sup>+</sup>CD45RO<sup>+</sup>), effector memory (EM, CD27<sup>+</sup>CD45RO<sup>+</sup>) and  
459 effector (CD27<sup>-</sup>CD45RO<sup>-</sup>) CD4<sup>+</sup> and CD8<sup>+</sup> T-cells of autoHSCT patients (patients A to F) and HCs (naive  
460 in blue, CM in orange, EM in green and effector in grey). For patient characteristics see Figure 1B, for  
461 the T-cell subset distribution per patient over time see Sup. Figure 3.



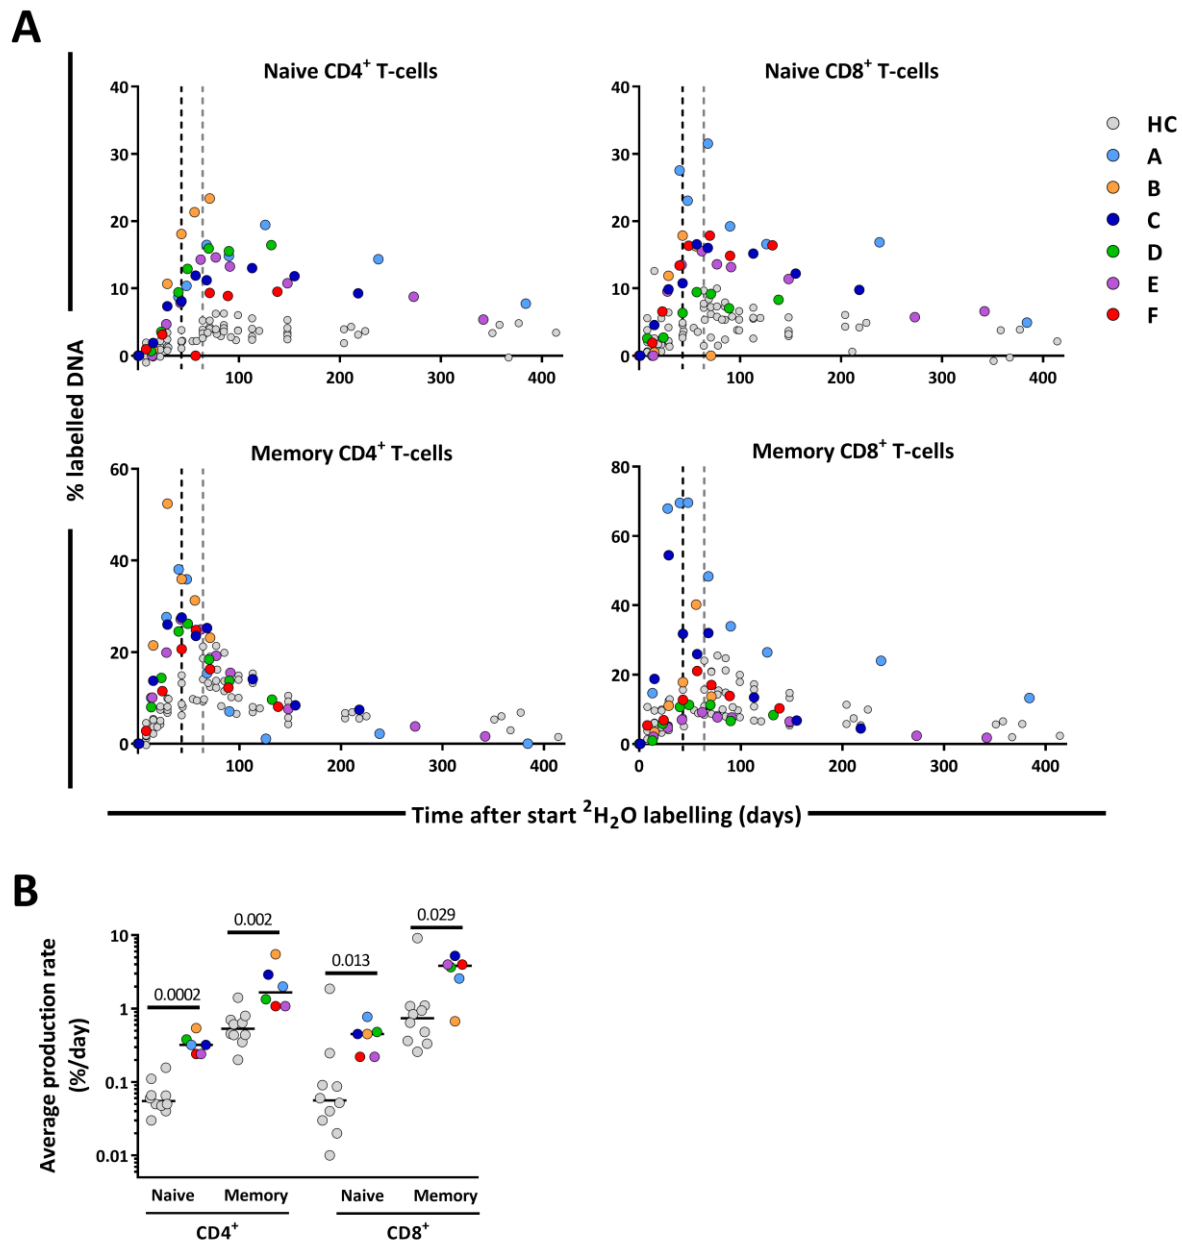

462

463 **Figure 3. T-cell dynamics after autoHSCT. (A)** Deuterium enrichment in the DNA of naive and memory  
 464 CD4<sup>+</sup> and CD8<sup>+</sup> T-cells in autoHSCT patients (A to F, color symbols), and healthy controls (HCs, grey  
 465 symbols)<sup>16</sup>. Dotted lines correspond to the end of the labelling period (black for autoHSCT patients  
 466 and grey for HCs). Label enrichment T was scaled between 0 and 100% by normalizing for the maximum  
 467 enrichment in granulocytes (Sup. Figure 7). For individual fits see Sup. Figure 8. **(B)** Estimates of the  
 468 per cell production rate of naive and memory CD4<sup>+</sup> and CD8<sup>+</sup> T-cells in autoHSCT patients and HCs<sup>16</sup>.  
 469 Different symbols indicate different individuals, autoHSCT patients (A to F) in color and HCs in grey.  
 470 Horizontal lines represent median values. P-values of significant differences between groups are  
 471 shown.

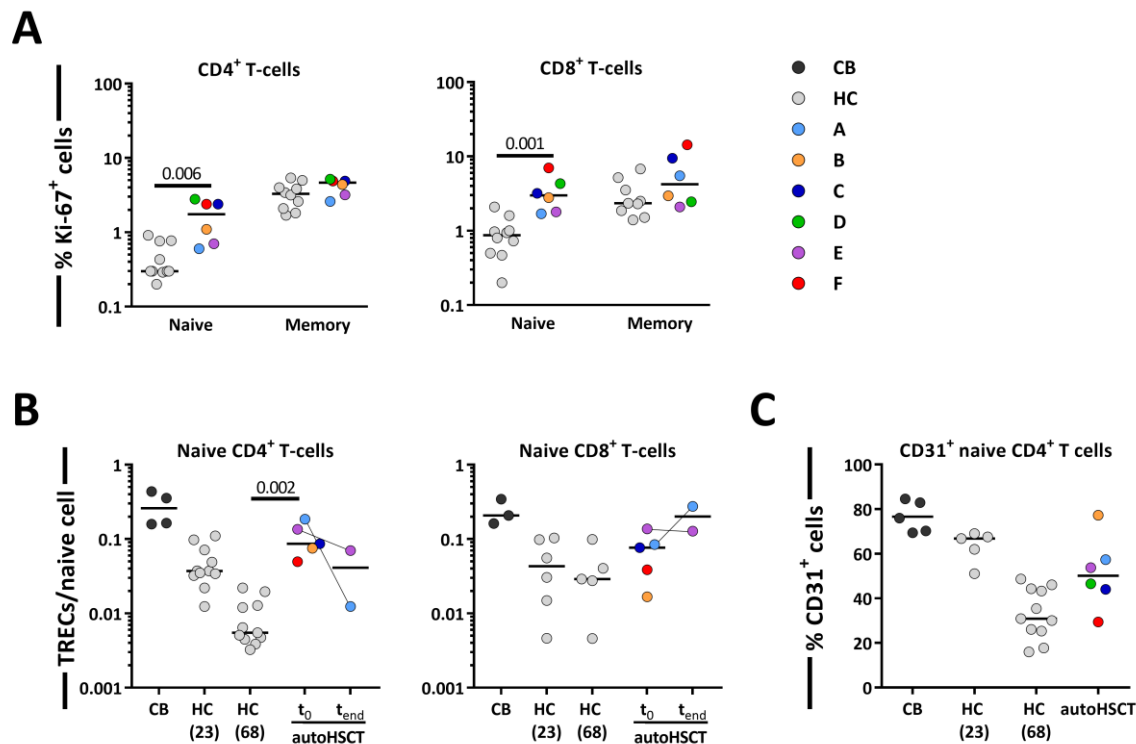

472

473 **Figure 4. Contribution of peripheral proliferation and thymic output to T-cell production after**

474 **autoHSCT. (A)** Ki-67 expression was measured within naive and memory CD4<sup>+</sup> (left panel) and CD8<sup>+</sup>

475 (right panel) T-cell in autoHSCT patients and HCs <sup>16</sup>. **(B)** Average number of TRECs per naive CD4<sup>+</sup> (left

476 panel) and CD8<sup>+</sup> (right panel) T-cell in autoHSCT patients, cord blood (CB) and healthy controls (HCs)

477 <sup>16</sup>. For *Patient A* and *Patient E*, TREC content was measured the first day of the study (t<sub>0</sub>) as well as the

478 last study visit (t<sub>end</sub>). For *Patient D*, TREC content was not successfully measured due to limited

479 material. **(C)** CD31 expression was measured within naive CD4<sup>+</sup> T-cells in autoHSCT patients, cord blood

480 and HCs <sup>16</sup>. For changes in CD31 expression and absolute numbers of CD31<sup>+</sup> cells over time, see Sup.

481 Figure 4. Different symbols indicate different individuals, autoHSCT patients (A to F) in color, CB in dark

482 grey, and young (median age of 23 years) and old (median age of 68 years) HCs in light grey. Horizontal

483 lines represent median values. P-values of significant differences between groups are shown.

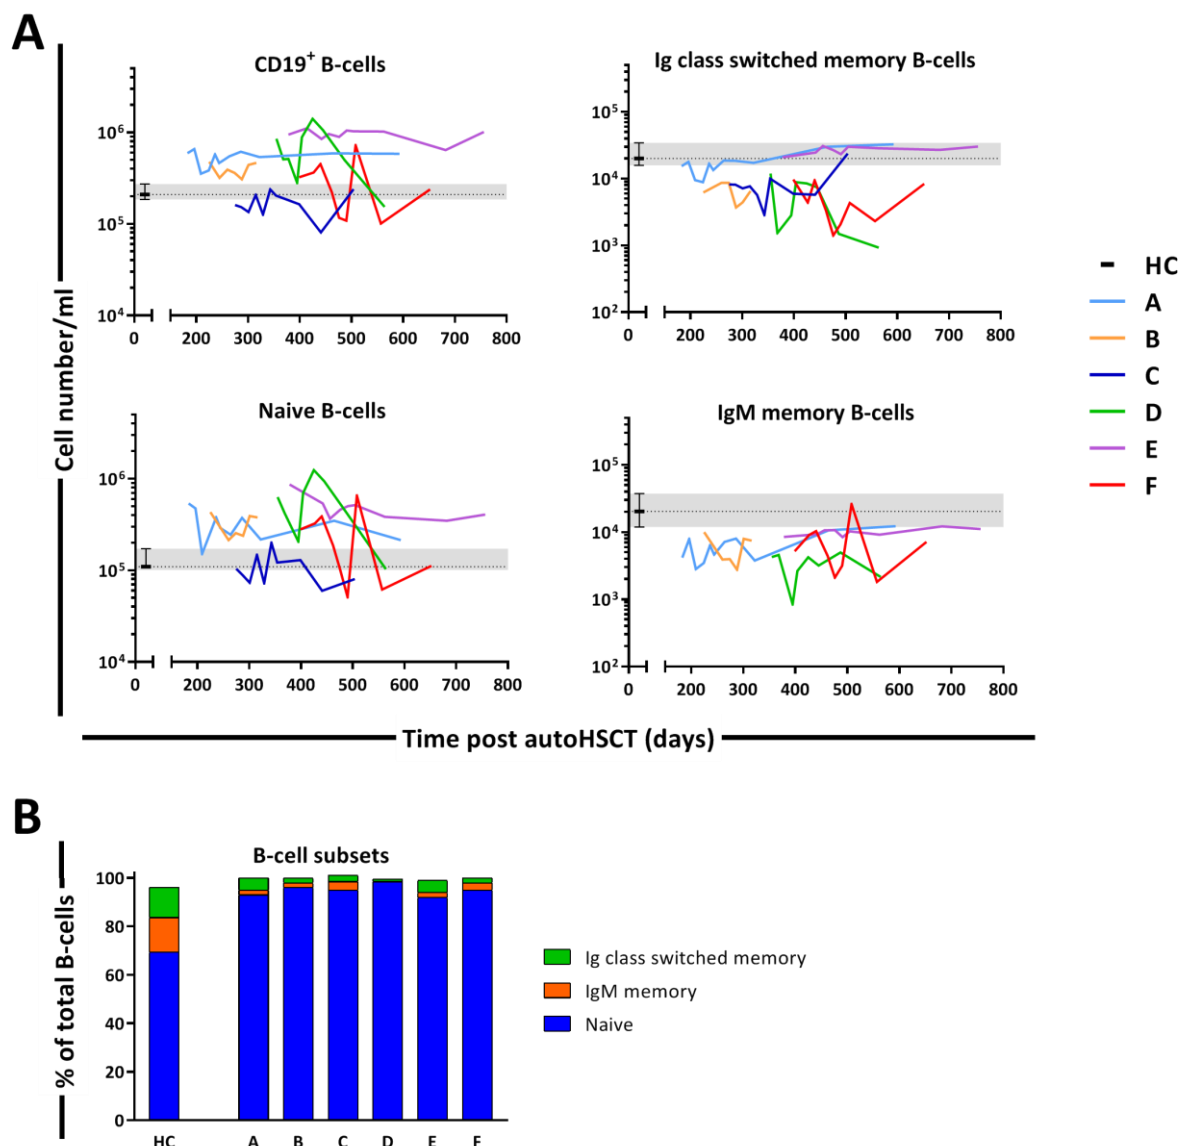

484  
 485 **Figure 5. B-cell reconstitution following autoHSCT. (A)** Absolute numbers (cells per milliliter) of total  
 486 CD19<sup>+</sup> B-cells, naive (CD19<sup>+</sup>IgM<sup>+</sup>CD27<sup>-</sup>), Ig class-switched memory (CD19<sup>+</sup>IgM<sup>-</sup>CD27<sup>+</sup>) and IgM<sup>+</sup> memory  
 487 (CD19<sup>+</sup>IgM<sup>+</sup>CD27<sup>+</sup>) B-cells in peripheral blood over time. Graphs show the absolute cell counts per  
 488 milliliter in autoHSCT patients (patients A to F) over the duration of the study, and the median and the  
 489 corresponding IR (interquartile range) for HCs (healthy controls, grey area and whisker bars). **(B)** Bar  
 490 graphs show the median percentage of naive, Ig class-switched memory and IgM<sup>+</sup> memory B-cells  
 491 within total CD19<sup>+</sup> B-cells of autoHSCT patients (patients A to F) and HCs (naive in blue, natural effector  
 492 in orange and memory in green). For the B-cell subset distribution per patient over time see Sup. Figure  
 493 5. Note the different y-axes in panel A.

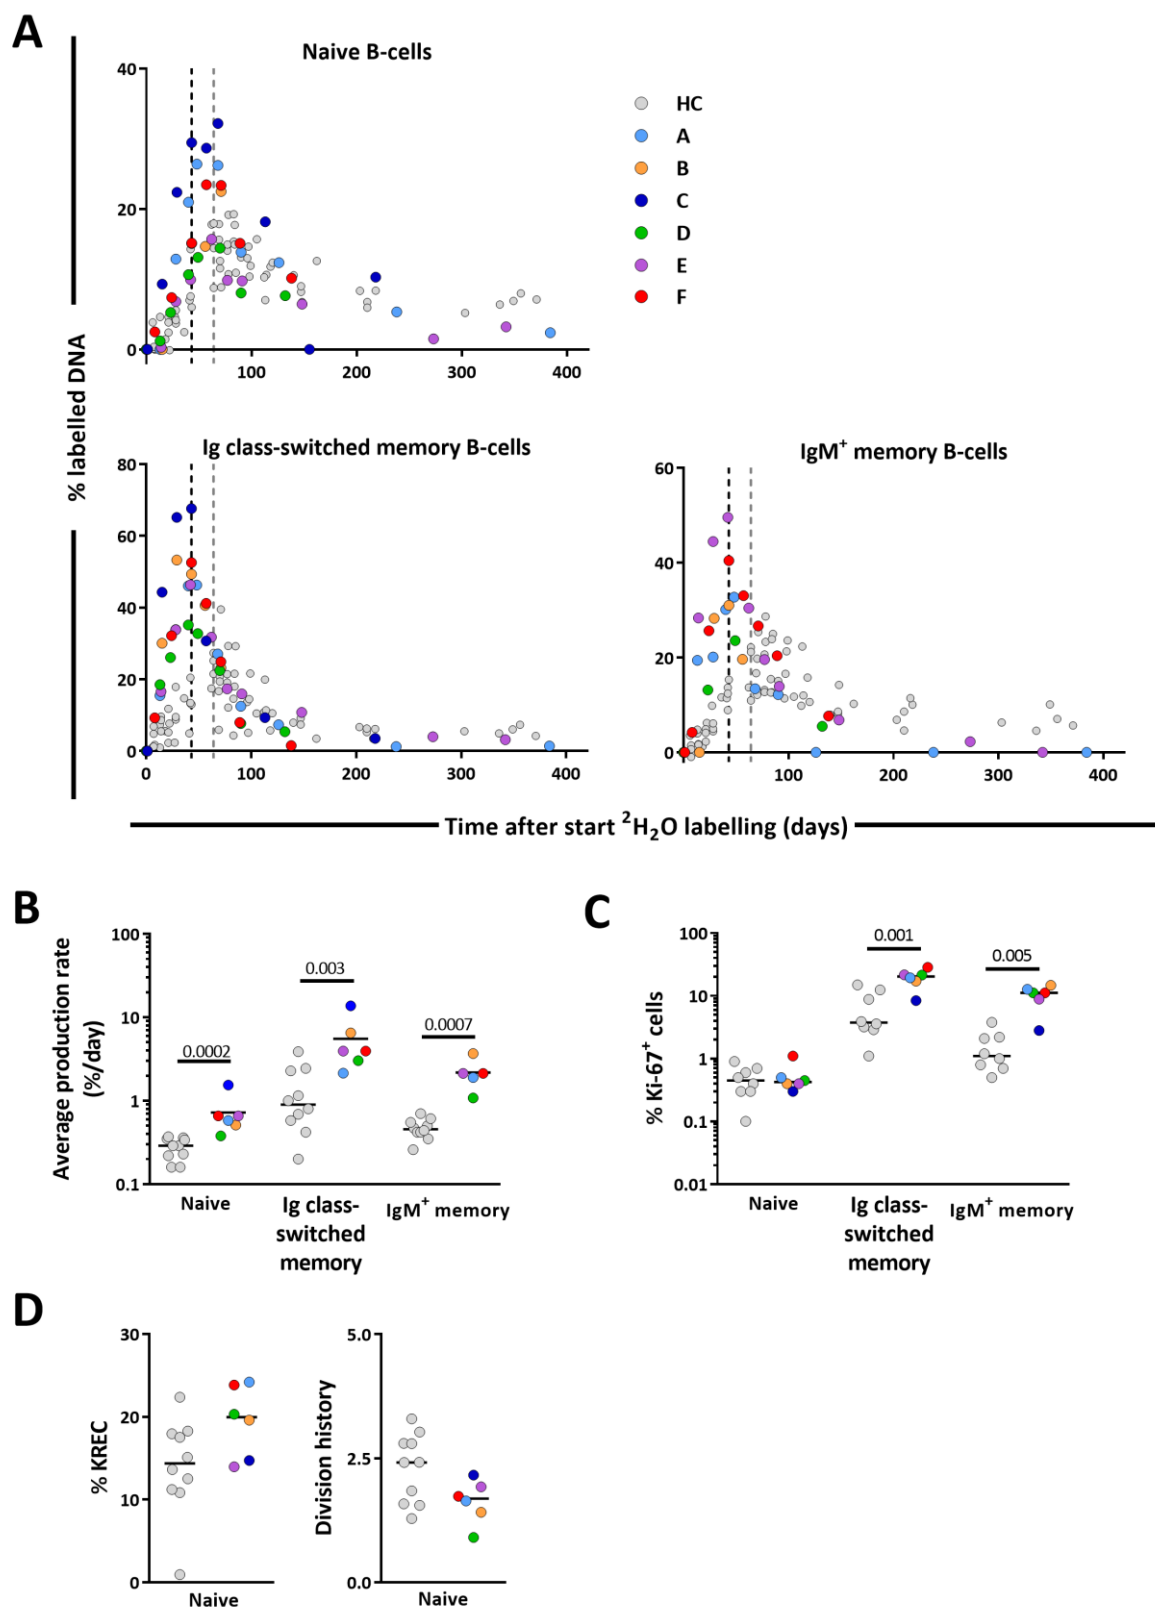

494

495 **Figure 6. B-cell dynamics after autoHSCT. (A)** Deuterium enrichment in the DNA of naive, Ig class-  
 496 switched memory and IgM<sup>+</sup> memory B-cells in autoHSCT patients (A to F, color symbols), and healthy  
 497 controls (HCs, grey symbols)<sup>16</sup>. Dotted lines correspond to the end of the labelling period (black for

498 autoHSCT patients and grey for HCs). Label enrichment was scaled between 0 and 100% by normalizing  
499 for the maximum enrichment in granulocytes for each patient (Sup. Figure 8). For individual fits see  
500 Sup. Figure 9. **(B)** Estimates of the per cell production rates of naive, Ig class-switched memory and  
501 IgM<sup>+</sup> memory B-cells in autoHSCT patients and HCs <sup>16</sup>. **(C)** Ki-67 expression was measured within naive,  
502 Ig class-switched memory and IgM<sup>+</sup> memory B-cells in autoHSCT patients and HCs <sup>16</sup>. **(D)** Percentage of  
503 naive B-cells containing a KREC and naive B-cell replication history for autoHSCT patients and HCs <sup>16</sup>.  
504 Different symbols indicate different individuals, autoHSCT patients (A to F) in color and HCs in grey.  
505 Horizontal lines represent median values. P-values of significant differences between groups are  
506 shown.

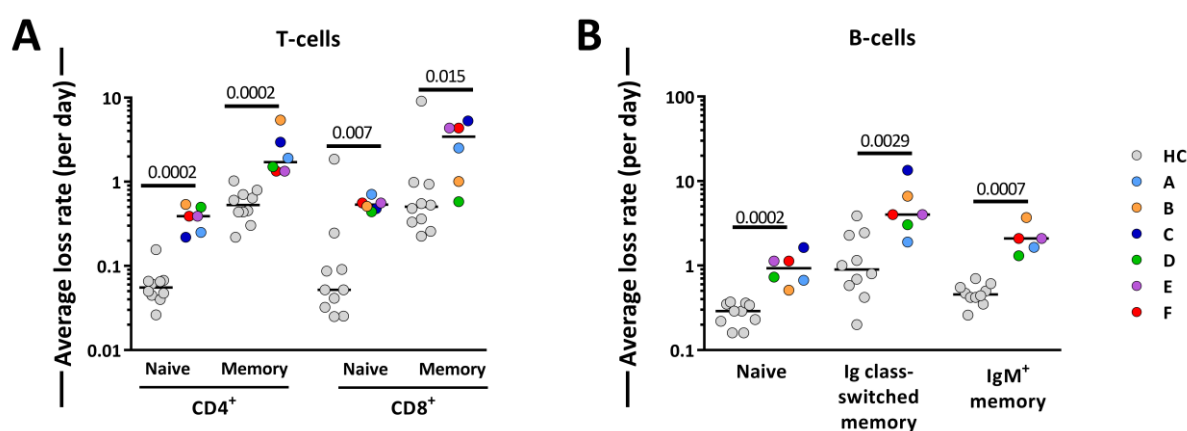

507  
508 **Figure 7. Average T-cell and B-cell loss rates following autoHSCT. (A)** Estimates of the average loss  
509 rates of naive and memory CD4<sup>+</sup> and CD8<sup>+</sup> T-cells and of **(B)** naive, Ig class-switched memory and IgM<sup>+</sup>  
510 memory B-cells in autoHSCT patients (A to F, color symbols), and healthy controls (HC, grey symbols)  
511 <sup>16</sup>. Average loss rates were calculated using the estimated average turnover rates and the corrected  
512 cell numbers (Sup. Figure 10 and 11) as described in supplementary material and methods. Horizontal  
513 lines represent median values. P-values of significant differences between groups are shown.

514  
515  
516  
517  
518  
519
